# Supplementary material for: Live monitoring of cellular metabolism and mitochondrial respiration in 3D cell culture system using NMR spectroscopy
Source: Royal Society of Chemistry journal article supplement (doi:10.1039/d1an00041a), 2021-01-01
Supplement: d1an00041a3.pdf [file d1an00041a3.pdf]

| Cell Culture Condition                     | Perfusion<br>[ml/min] | $\Delta$ Glucose<br>[mmol/L*24h] | $\Delta$ Lactate<br>[mmol/L*24h] |
|--------------------------------------------|-----------------------|----------------------------------|----------------------------------|
| 3D in Incubator (Petri Dish)               | -                     | 1.3                              | 2.4                              |
| 3D in NMR                                  | 0.025                 | 1.3                              | 2.3                              |
| 3D in NMR                                  | 0.05                  | 1.8                              | 2.3                              |
| 3D in NMR                                  | 0.1                   | 2.1                              | 2.1                              |
| 3D in NMR                                  | 0.2                   | 2.2                              | 2.1                              |
| 3D in NMR                                  | 0.3                   | 2.1                              | 2.1                              |
| 2D in Incubator (175cm <sup>2</sup> Flask) | -                     | 2.9                              | 5.5                              |
